# Supplementary material for: Mitochondria-targeted carbon monoxide delivery combined with singlet oxygen production from a single nanoplatform under 808 nm light irradiation for synergistic anticancer therapy
Source: Royal Society of Chemistry journal article supplement (doi:10.1039/d1tb00478f), 2021-01-01
Supplement: d1tb00478f1.pdf [file d1tb00478f1.pdf]

*Supplementary information*

*for:*

**Mitochondria-targeted Carbon Monoxide Delivery Combined with Singlet Oxygen Production from a Single Nanoplatfom under 808 nm Light Irradiation for Synergistic Anticancer Therapy**

Qi Tang,<sup>†</sup> Hai-Lin Zhang,<sup>†</sup> Yi Wang,<sup>†</sup> Jing Liu,<sup>†</sup> Shi-Ping Yang,<sup>§</sup> and Jin-Gang Liu<sup>\*,†</sup>

<sup>†</sup>Key Laboratory for Advanced Materials, School of Chemistry & Molecular Engineering, East China University of Science and Technology, Shanghai 200237, P. R. China, E-mail: liujingang@ecust.edu.cn

<sup>§</sup>Key Lab of Resource Chemistry of MOE & Shanghai Key Lab of Rare Earth Functional Materials, Shanghai Normal University, Shanghai 200234, P. R. China

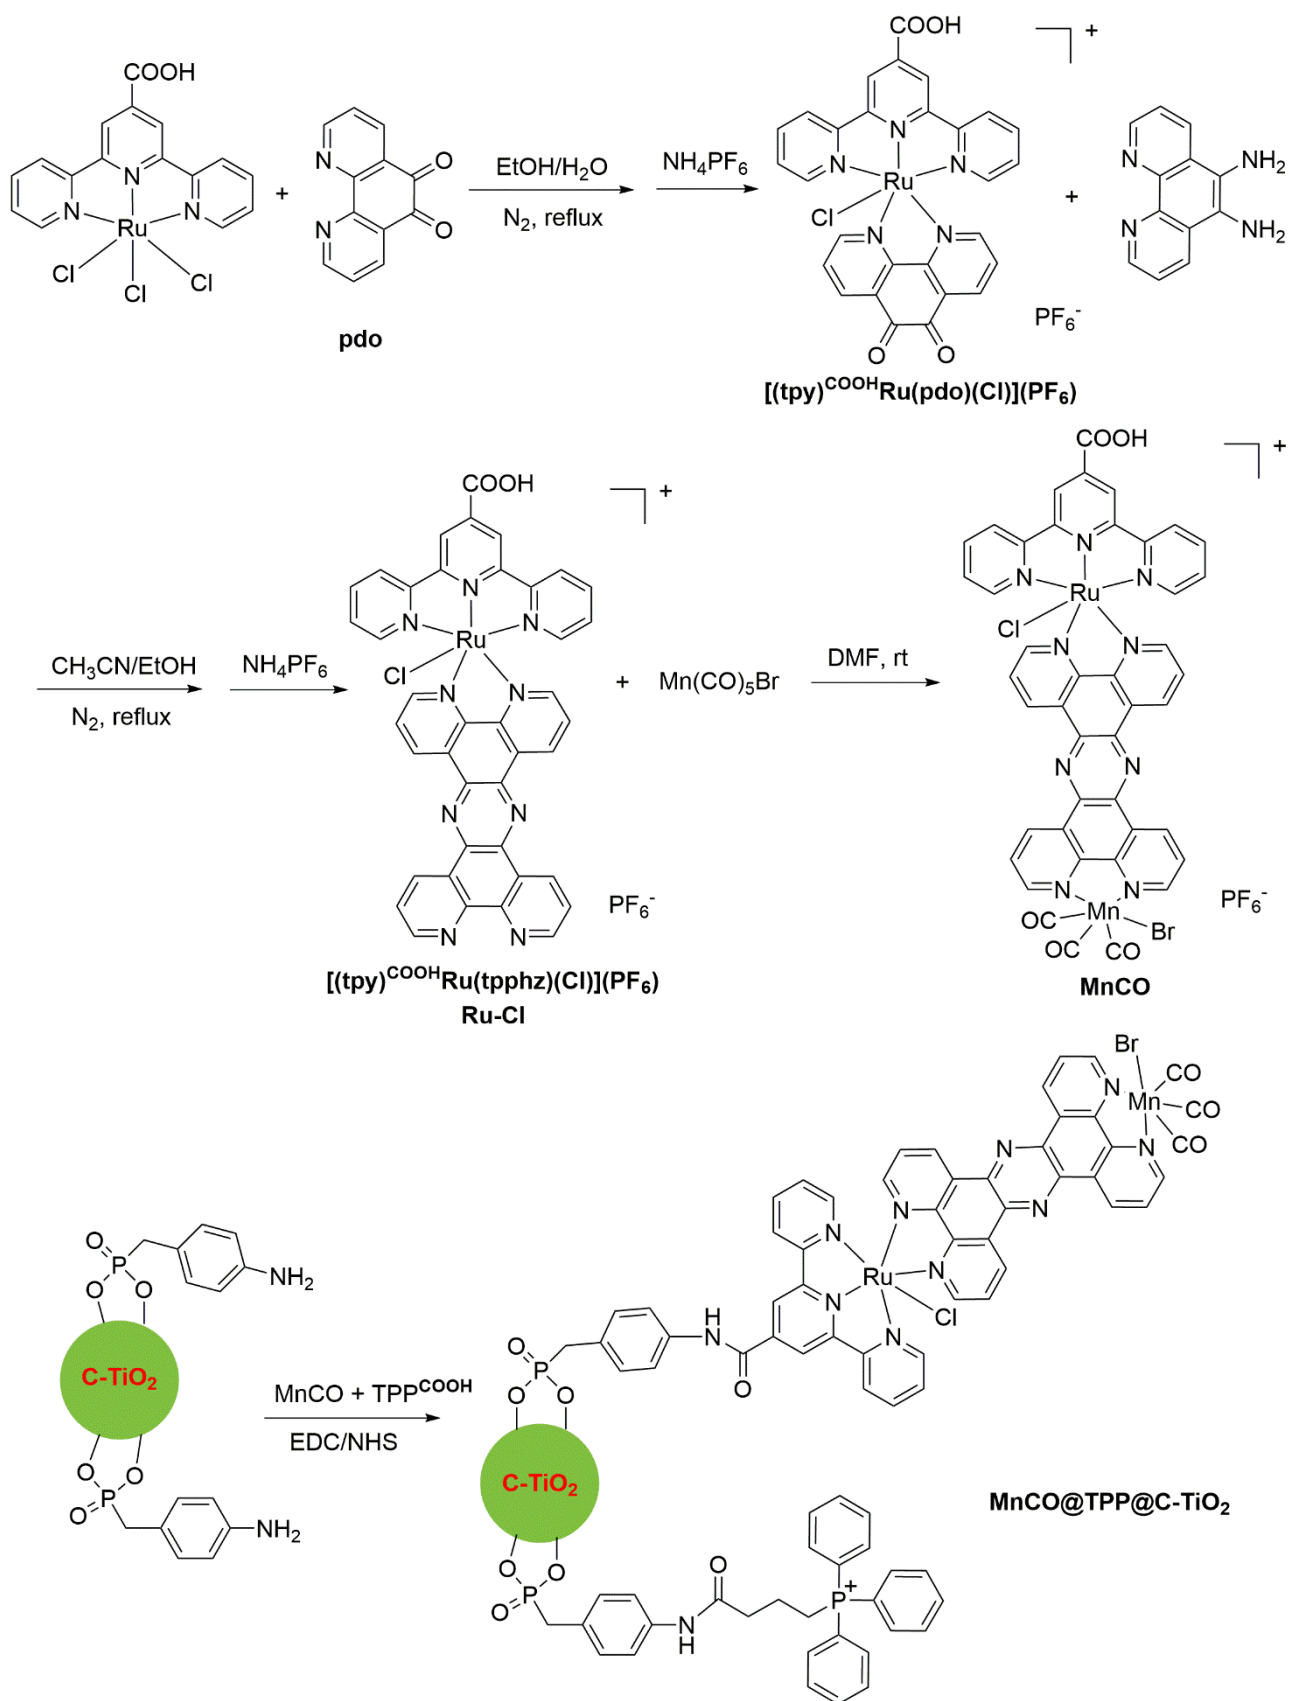

**Scheme S1** Preparation procedures of nanoplatform (1).

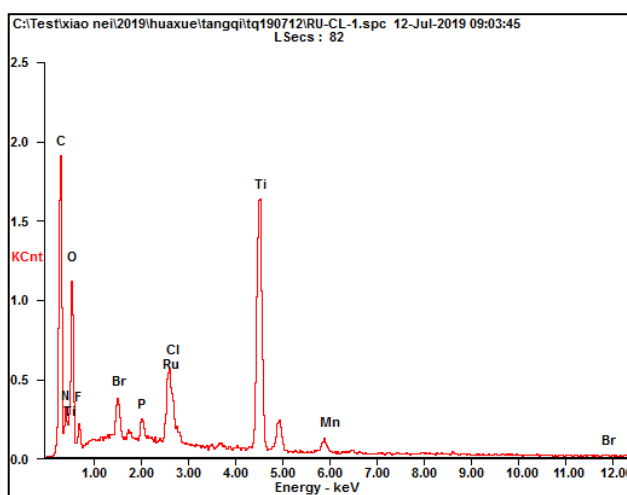

| <i>Element</i> | <i>Wt %</i> | <i>At %</i> |
|----------------|-------------|-------------|
| <i>CK</i>      | 28.61       | 50.82       |
| <i>NK</i>      | 00.18       | 00.27       |
| <i>OK</i>      | 19.63       | 26.17       |
| <i>FK</i>      | 02.20       | 02.48       |
| <i>BrL</i>     | 03.03       | 00.81       |
| <i>PK</i>      | 00.85       | 00.59       |
| <i>RuL</i>     | 06.63       | 01.40       |
| <i>ClK</i>     | 02.27       | 01.36       |
| <i>TiK</i>     | 33.17       | 14.77       |
| <i>MnK</i>     | 03.43       | 01.33       |

Fig. S1 EDS spectrum of nanoplateform (1).

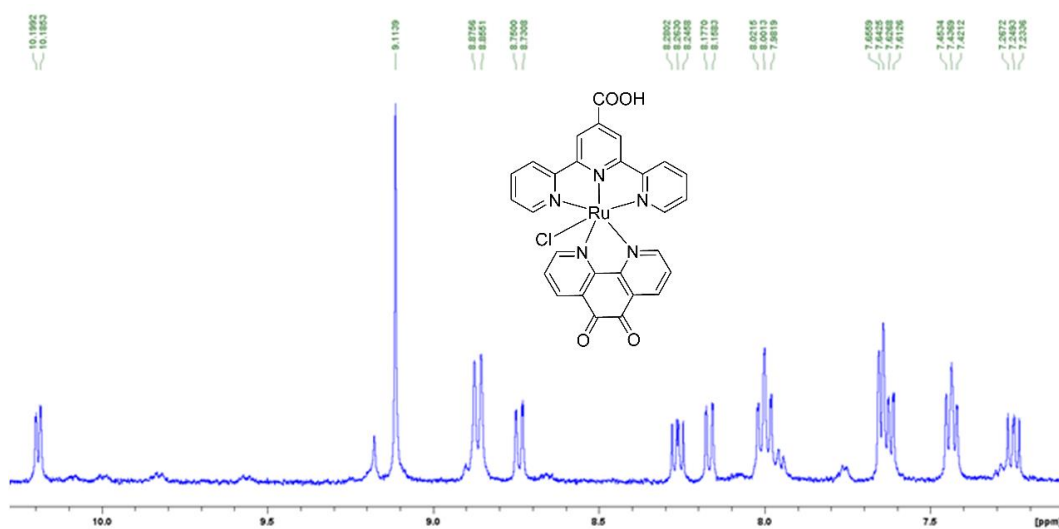

Fig. S2 <sup>1</sup>H NMR spectrum of [(tpy<sup>COOH</sup>)Ru(pdo)(Cl)](PF<sub>6</sub>) in DMSO-*d*<sub>6</sub>.

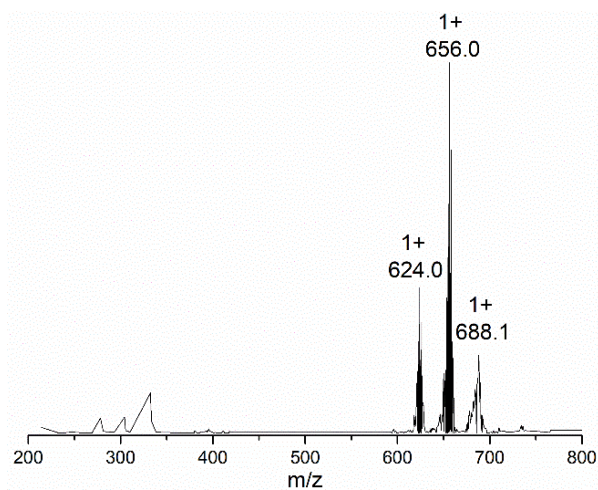

**Fig. S3** ESI Mass spectrum of  $[(\text{tpy}^{\text{COOH}})\text{Ru}(\text{pdo})(\text{Cl})](\text{PF}_6)$ .

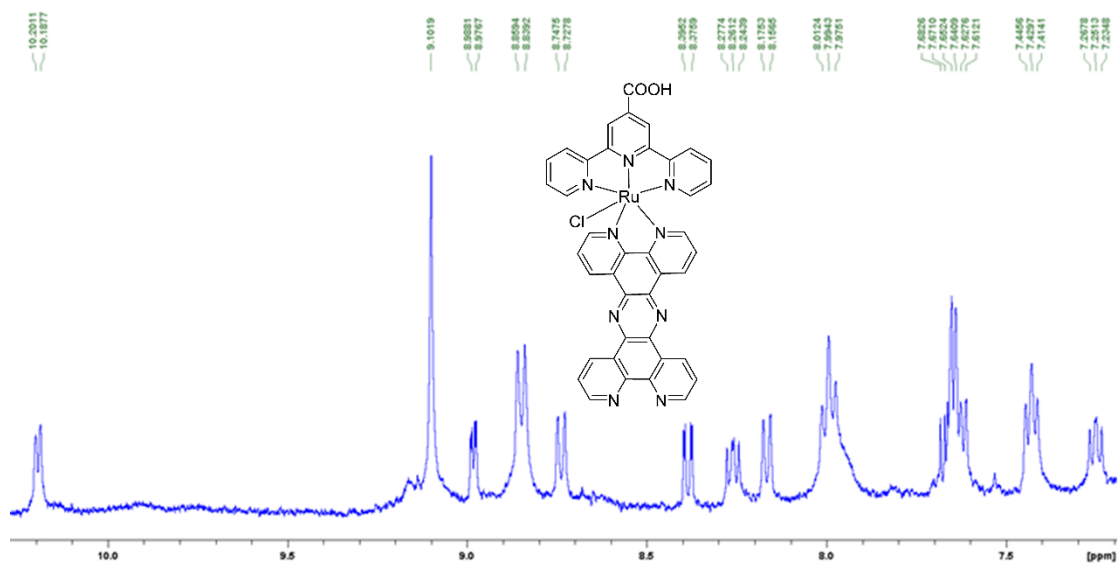

**Fig. S4**  $^1\text{H}$  NMR spectrum of  $[(\text{tpy}^{\text{COOH}})\text{Ru}(\text{tpphz})(\text{Cl})](\text{PF}_6)$  in  $\text{DMSO-}d_6$ .

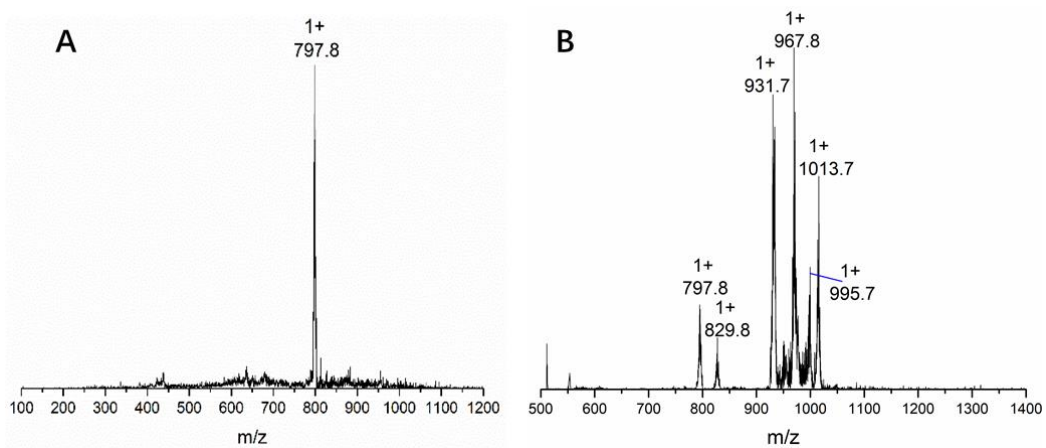

**Fig. S5** ESI Mass spectra of  $[(\text{tpy}^{\text{COOH}})\text{Ru}(\text{tpphz})(\text{Cl})](\text{PF}_6)$  (A) and Mn-CO (B).

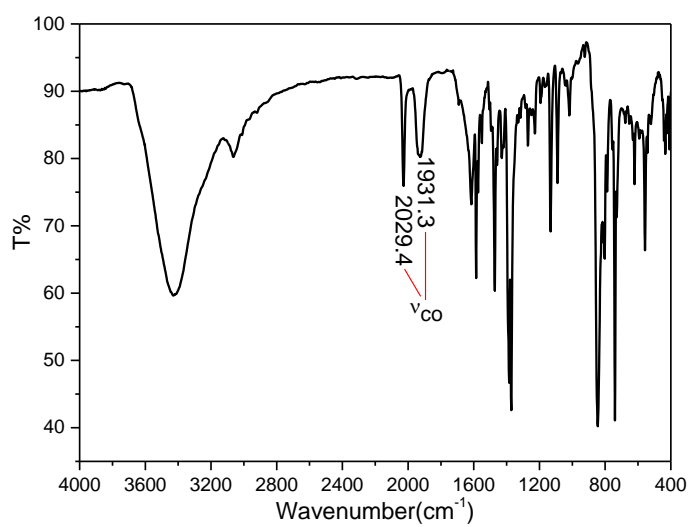

**Fig. S6** FTIR spectrum of Mn-CO.

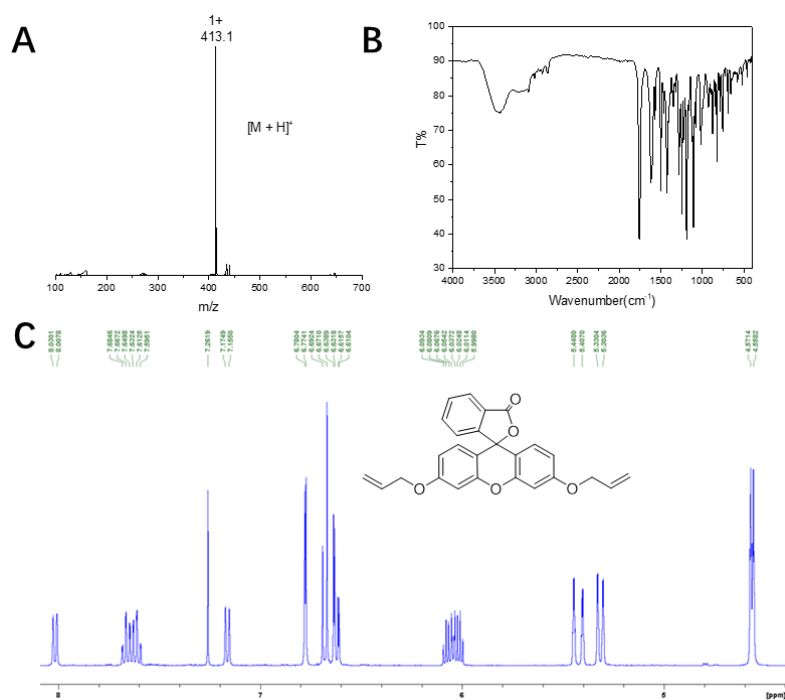

**Fig. S7** ESI Mass spectrum (A), FTIR spectrum (B) and  $^1\text{H}$  NMR spectrum (C) of the CO probe (FL-CO-1).

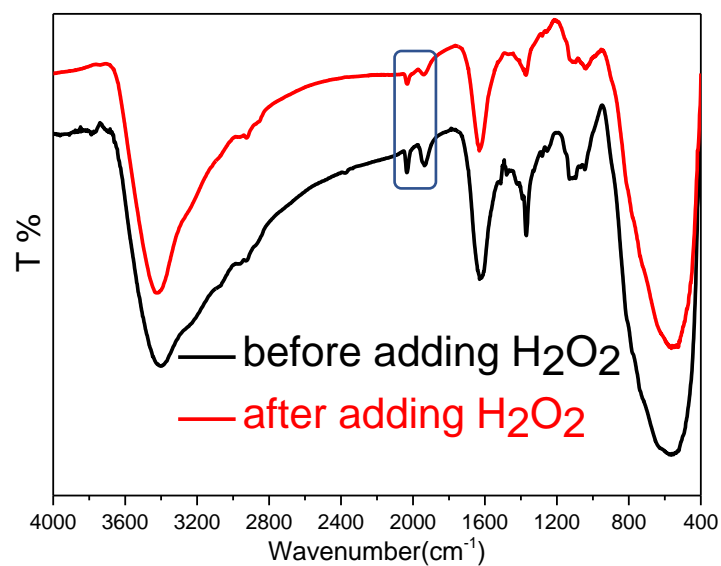

**Fig. S8** FTIR spectrum of nanoplatform (1) before and after adding  $100 \mu\text{M}$   $\text{H}_2\text{O}_2$ .

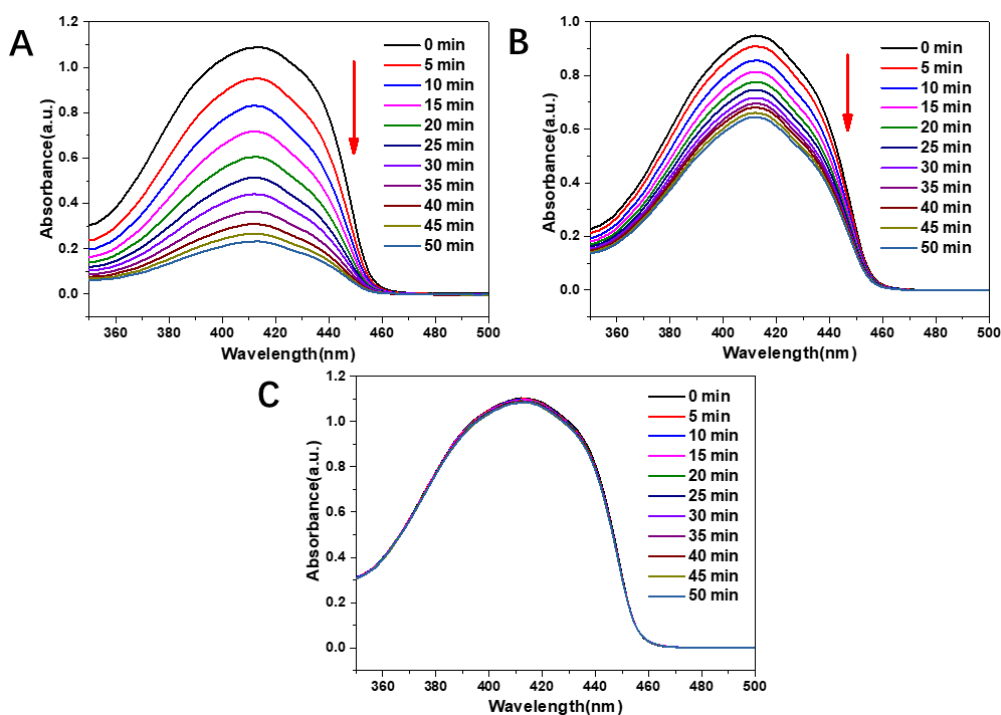

**Fig. S9** Absorbance spectrum changes of DPBF treated with nanoplatform (1) (A) and C-TiO<sub>2</sub> (B) after 808 nm laser (1.0 W/cm<sup>2</sup>) irradiation for different times. (C) Absorbance spectrum changes of DPBF treated with 808 nm laser (1.0 W/cm<sup>2</sup>) only.

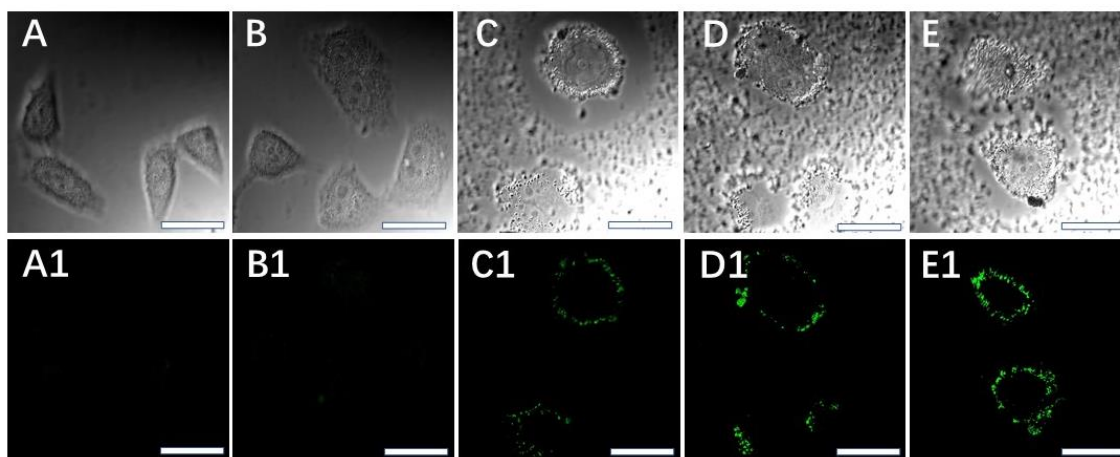

**Fig. S10** Intracellular fluorescence image of CO by probe system (probe + PdCl<sub>2</sub>, 1 μM each). Top row A-E: bright field image. Bottom row: fluorescence images of A-E, respectively. (A, A1) The HeLa cells were incubated with probe for 30 min. (B, B1) The HeLa cells were incubated with PdCl<sub>2</sub> for 30 min. (C and C1, D and D1, E and E1) The HeLa cells were preincubated with 50, 100 and 200 μM of nanoplatform (1) for 4 h and then incubated with probe and PdCl<sub>2</sub> for 30 min, respectively. Scale bars: 25 μm.

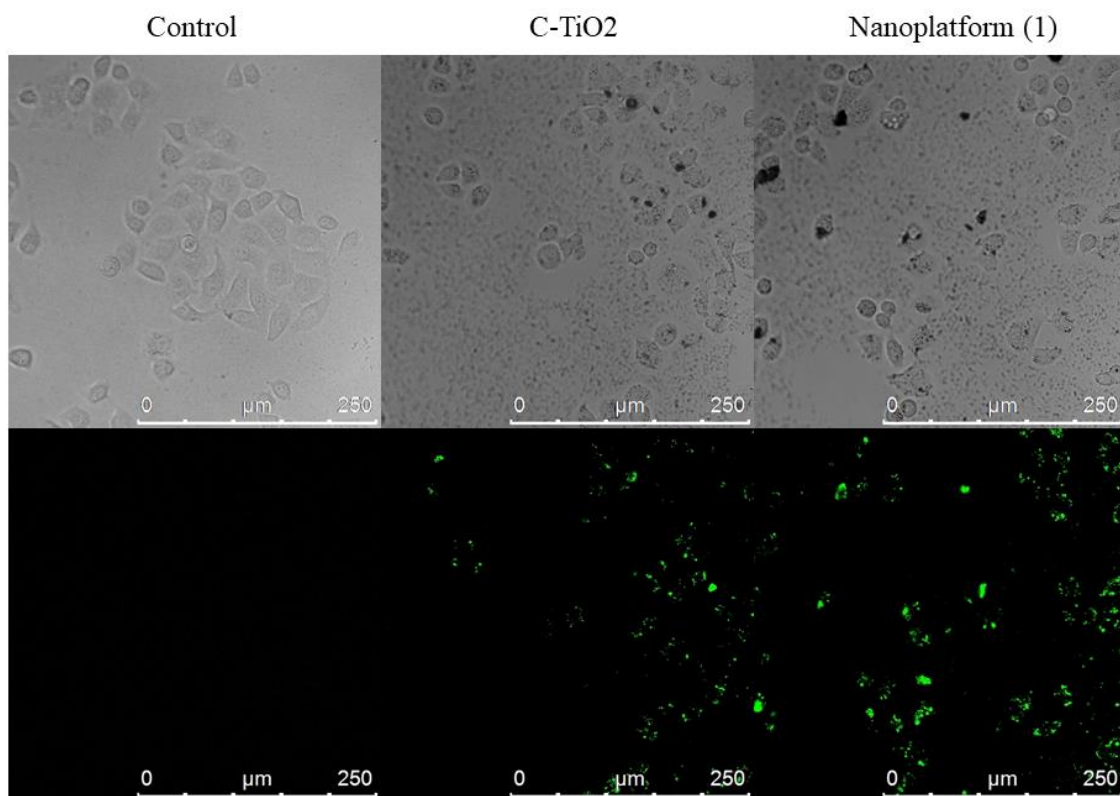

**Fig. S11** Intracellular fluorescence image of  $^1\text{O}_2$  by DCFH-DA. Top row: bright field image. Bottom row: fluorescence images. Scale bars: 250  $\mu\text{m}$ .

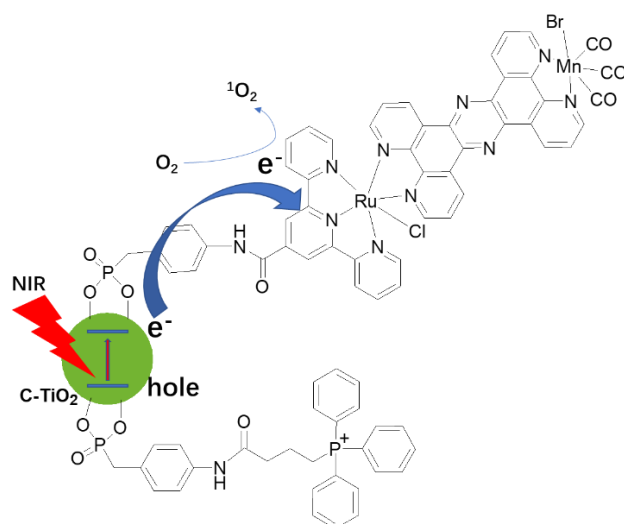

**Fig. S12** Plausible mechanism for  $^1\text{O}_2$  production by nanoplatfrom (1).
